# Supplementary material for: An Update of Cutaneous Melanoma Patients Treated in Adjuvancy With the Allogeneic Melanoma Vaccine VACCIMEL and Presentation of a Selected Case Report With In-Transit Metastases
Source: PubMed Central journal article supplement (PMC9011367; doi:10.3389/fimmu.2022.842555), 2022-04-01
Supplement: Image_1.pdf [file Image_1.pdf]

A

| Immune populations | N° cells/mm <sup>2</sup> |               |                |
|--------------------|--------------------------|---------------|----------------|
|                    | PRE-VACCIMEL             | POST-VACCIMEL | POST-NIVOLUMAB |
| CD8 PT             | 147 ± 8                  | 378 ± 11      | 706 ± 10       |
| CD8 IT             | 1 ± 0                    | 48 ± 8        | 106 ± 5        |
| CD11c PT           | 42 ± 3                   | 198 ± 6       | 207 ± 8        |
| CD11c IT           | 19 ± 2                   | 114 ± 3       | 205 ± 9        |
| CD68 PT            | 96 ± 7                   | 274 ± 9       | 150 ± 3        |
| CD68 IT            | 104 ± 4                  | 244 ± 5       | 137 ± 8        |

PT: peri-tumoral, IT: intra-tumoral

B

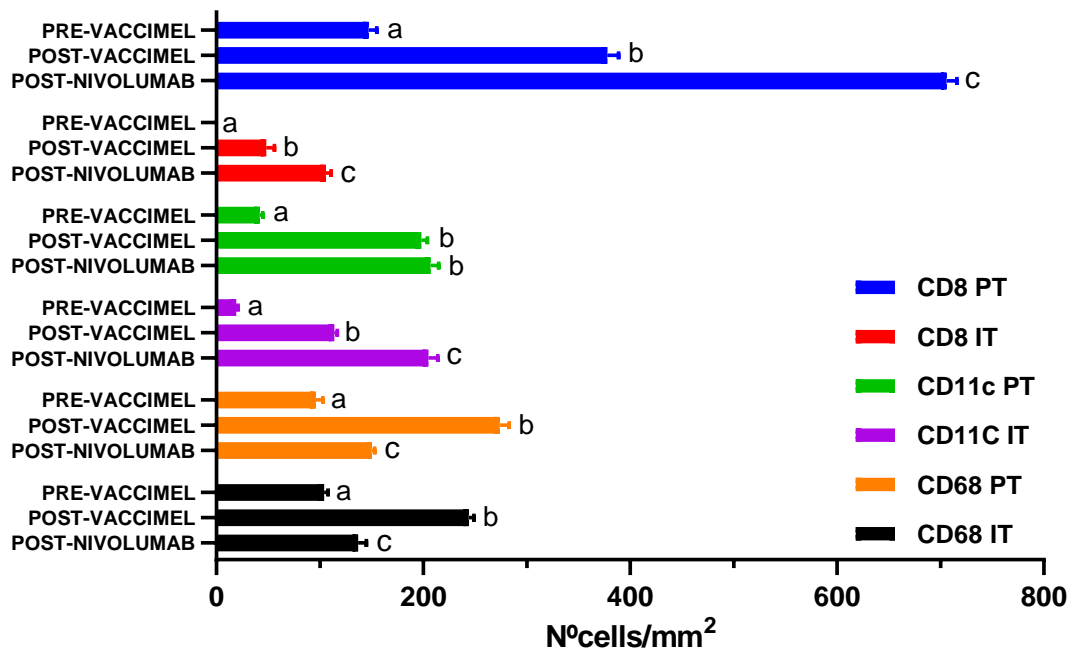

**Supplementary Figure 1. Immune infiltrate analysis of Patient#5 ITM biopsies.**

Comparative analysis of tumor-infiltrating immune populations was performed by immunohistochemistry on ITM biopsies obtained before and after VACCIMEL immunization, and following nivolumab treatment, as described under Methods. (A) Table with quantification of CD8, CD11c and CD68 positive cells, distinguishing zones with peritumoral (PT) and intratumoral (IT) infiltrate. (B) Bars show mean cells/mm<sup>2</sup> ±SD; bars with different letters are statistically different (Tukey's multiple comparisons test, p < 0.05)
